# Supplementary material
Source: PubMed Central journal article supplement (PMC3537814)
Supplement: supp_112161_cardio-garg-1-at.pdf [file supp_112161_cardio-garg-1-at.pdf]

**Appendix 1:** Comparison of Walkerton and neighbouring rural towns at the time of the 2001 Census.

|                                                 | <i>Walkerton</i> | <i>Listowel</i> | <i>Shelburne</i> | <i>St. Mary's</i> | <i>Exeter</i> | <i>Mount Forest</i> | <i>Penetanguishene</i> |
|-------------------------------------------------|------------------|-----------------|------------------|-------------------|---------------|---------------------|------------------------|
| <i>Town Demographics*</i>                       |                  |                 |                  |                   |               |                     |                        |
| Population                                      | <b>4851</b>      | 5905            | 4122             | 6293              | 4452          | 4584                | 8316                   |
| Age, yr, median                                 | <b>40</b>        | 39              | 37               | 39                | 41            | 42                  | 41                     |
| Lived at same address for at least one year (%) | <b>92</b>        | 86              | 86               | 89                | 89            | 88                  | 83                     |
| Total Income , \$, median                       | <b>21 265</b>    | 24 683          | 21 034           | 25 332            | 24 748        | 20 247              | 20 351                 |
| Employment Rate (%)                             | <b>63</b>        | 64              | 65               | 66                | 64            | 57                  | 59                     |
| <i>Availability of Healthcare</i>               |                  |                 |                  |                   |               |                     |                        |
| Hospital in Town                                | <b>Yes</b>       | Yes             | Yes              | Yes               | Yes           | Yes                 | Yes                    |
| Number of Hospital Beds                         | <b>38</b>        | 51              | 33               | 21                | 19            | 37                  | 51                     |
| Emergency Room in Hospital                      | <b>Yes</b>       | Yes             | No               | Yes               | Yes           | Yes                 | No                     |
| Number of Primary Care Physicians               | <b>6</b>         | 12              | 4                | 13                | 10            | 5                   | 12                     |
| <i>Post-Secondary Education (%)*</i>            |                  |                 |                  |                   |               |                     |                        |
| Ages 35-44                                      | <b>38</b>        | 41              | 37               | 43                | 31            | 33                  | 35                     |
| Ages 45-64                                      | <b>31</b>        | 27              | 30               | 32                | 39            | 19                  | 33                     |
| <i>Residences by Postal Code<sup>†</sup></i>    |                  |                 |                  |                   |               |                     |                        |
| Total Residences                                | <b>3067</b>      | 3633            | 3995             | 3494              | 2393          | 2869                | 4966                   |
| Residences on Rural Routes                      | <b>1085</b>      | 1148            | 1972             | 1154              | 256           | 972                 | 1580                   |
| % of Residences on Rural Routes                 | <b>35</b>        | 32              | 49               | 33                | 11            | 34                  | 32                     |

Rural Routes: registered mailing addresses along or near well defined roads in reasonably well settled rural areas

\*Data from 2001 Census; Statistics Canada

<sup>†</sup>Data from Canada Post
