# Supplementary material
Source: PubMed Central journal article supplement (PMC3537814)
Supplement: supp_112161_cardio-garg-2-at.pdf [file supp_112161_cardio-garg-2-at.pdf]

**Appendix 2:** Definitions of all exclusions, previous cardiovascular events and chronic gastrointestinal disease using diagnostic and procedural codes

- Use all diagnostic fields to identify these criteria (not just 'Most Responsible Diagnosis'), all exclusion criteria are defined as  $\geq$  one code prior to, but not including, the index date

| <b>Medical Diagnoses</b>                           |                                                                                                                                                                                                                                                                                                                |                                                                                                                                 |                                                |
|----------------------------------------------------|----------------------------------------------------------------------------------------------------------------------------------------------------------------------------------------------------------------------------------------------------------------------------------------------------------------|---------------------------------------------------------------------------------------------------------------------------------|------------------------------------------------|
| <b>Database<sup>a</sup>:</b>                       | ICD-9                                                                                                                                                                                                                                                                                                          | ICD-10                                                                                                                          | OHIP-Dx                                        |
| <b>Cardiovascular Disease</b>                      |                                                                                                                                                                                                                                                                                                                |                                                                                                                                 |                                                |
| <i>CVD</i>                                         | 390 – 459                                                                                                                                                                                                                                                                                                      | I00 - I99                                                                                                                       | 410, 412, 413, 432, 435-437, 440, 428          |
| <i>Chest pain</i>                                  | 7865                                                                                                                                                                                                                                                                                                           | R071-R074                                                                                                                       |                                                |
| <b>Chronic Gastrointestinal Disease</b>            |                                                                                                                                                                                                                                                                                                                |                                                                                                                                 |                                                |
|                                                    | 531.4-531.7, 531.9, 532.4-532.7, 532.9, 533.4-533.7, 533.9, 534.4-534.7, 534.9, 535.1- 535.6, 536.0-536.2, 536.8-537.6, 537.0-537.8, 537.9, 555.0-555.2, 555.9, 556.0, 557.1, 557.9, 558.1, 558.2, 558.9, 560.0-560.2, 560.3, 560.8, 560.9, 562.0, 562.1, 564.1-564.4, 564.7-564.9, 569.5, 569.6, 569.8, 569.9 | K254-K259, K264-K269, K274-K279, K284-K289, K293, K295, K296, K297, K298, K299, K30, K311-K319, K50-K52, K55-K59, K63, K90, K91 | 555-557, 560, 562, 564, 531, 532, 534-537, 579 |
| <b>Medical Procedures</b>                          |                                                                                                                                                                                                                                                                                                                |                                                                                                                                 |                                                |
| <b>Database<sup>a</sup>:</b>                       | CCP                                                                                                                                                                                                                                                                                                            | CCI                                                                                                                             | OHIP Fee Code                                  |
| <b>Cardiovascular Procedure</b>                    |                                                                                                                                                                                                                                                                                                                |                                                                                                                                 |                                                |
| Coronary artery angioplasty/ bypass graft          | 48.02, 48.03, 48.09, 48.11 - 48.19                                                                                                                                                                                                                                                                             | 1IJ50, 1IJ76                                                                                                                    | Z434, R742, R743                               |
| Carotid endarterectomy                             |                                                                                                                                                                                                                                                                                                                |                                                                                                                                 | N220, R792                                     |
| Abdominal aortic aneurysm repair and aortic bypass | 50.24, 50.34                                                                                                                                                                                                                                                                                                   | 1KA76                                                                                                                           | R802, R816, R817, R783, R784, R785, R814       |
| Peripheral vascular bypass surgery                 | 51.25                                                                                                                                                                                                                                                                                                          | 1KG76                                                                                                                           | R787, R780, R797, R804                         |

<sup>a</sup> CCI=Canadian Classification of Health Interventions; CCP=Canadian Classification of Diagnostic, Therapeutic and Surgical Procedures; ICD=International Classification of Diseases ; OHIP-Fee=Ontario Health Insurance Plan Fees.
