# Supplementary material
Source: PubMed Central journal article supplement (PMC3537814)
Supplement: supp_112161_cardio-garg-3-at.pdf [file supp_112161_cardio-garg-3-at.pdf]

**Appendix 3:** Definitions of death and major cardiovascular events using valid diagnostic and procedural codes

| Condition                                                           | Database <sup>a</sup> | Codes                                                                  | Validity                                               |
|---------------------------------------------------------------------|-----------------------|------------------------------------------------------------------------|--------------------------------------------------------|
| Death                                                               | RPDB, CIHI            | Vital status field                                                     | Sens: 94% <sup>41</sup> , PPV: 100% <sup>41</sup>      |
| Acute myocardial infarction                                         | CIHI (ICD-9)          | 410                                                                    | Sens: 89% <sup>36</sup> , PPV: 89% <sup>36</sup>       |
|                                                                     | CIHI (ICD-10)         | I21                                                                    | Sens: 89% <sup>42</sup> , PPV: 87% <sup>42</sup>       |
| Coronary artery angioplasty or coronary artery bypass graft surgery | CIHI (CCI)            | 1IJ50, 1IJ76                                                           | Sens: 99–100% <sup>42</sup> PPV: 97–100% <sup>42</sup> |
|                                                                     | CIHI (CCP)            | 48.02, 48.03, 48.09, 48.11–48.19                                       | Sens: 99% <sup>37,44</sup> PPV: 100%                   |
|                                                                     | OHIP-Fee              | Z434, R742, R743                                                       |                                                        |
| Stroke nonsubarachnoid haemorrhagic or infarction                   | CIHI (ICD-9)          | 431, 432.9, 434-434.9, 436                                             | Sens: 92%, PPV: 71% <sup>39</sup>                      |
|                                                                     | CIHI-(ICD-10)         | I61, I62, I63, I64                                                     | Sens: 75–81%, PPV: 69–87% <sup>42</sup>                |
| Carotid endarterectomy                                              | OHIP-Fee              | N220, R792                                                             |                                                        |
|                                                                     | CIHI-(CCI)            | 1KA76, 1KA80                                                           | Sens: 72-79%, PPV: 75-93% <sup>42</sup>                |
| Abdominal aortic aneurysm repair and aortic bypass                  | CIHI-(CCP)            | 50.24, 50.34                                                           |                                                        |
|                                                                     | OHIP-Fee              | R802, R816, R817, R783, R784, R785, R814                               |                                                        |
|                                                                     | CIHI-(CCI)            | 1KG76                                                                  | Sens: 87% <sup>42</sup> , PPV: 88% <sup>42</sup>       |
| Peripheral vascular bypass surgery                                  | CIHI-(CCP)            | 51.25                                                                  |                                                        |
|                                                                     | OHIP-Fee              | R780, R786, R787, R791, R794, R797- R799, R800, R803- R805, R807- R815 |                                                        |
|                                                                     | CIHI (ICD-9)          | 428.0-428.9                                                            | Sens: 77%, PPV: 88% <sup>38,43</sup>                   |
| Congestive Heart Failure                                            | CIHI (ICD-10)         | I50                                                                    | Sens: 86%, PPV: 86% <sup>40</sup>                      |

Note: Sens = sensitivity; PPV = positive predictive value.

<sup>a</sup> CCI=Canadian Classification of Health Interventions; CCP=Canadian Classification of Diagnostic, Therapeutic and Surgical Procedures; CIHI= Canadian Institute for Health Information; ICD=International Classification of Diseases; OHIP-Fee=Ontario Health Insurance Plan Fees; RPDB=Ontario Registered Persons Database
