# Supplementary material
Source: PubMed Central journal article supplement (PMC3537814)
Supplement: supp_112161_cardio-garg-5-at.pdf [file supp_112161_cardio-garg-5-at.pdf]

**Appendix 5:** Additional baseline characteristics of Walkerton health study participants. With the exception of laboratory and blood pressure parameters, which were assessed at the initial health study visit, characteristics were assessed by participant recall of conditions prior to the outbreak.

|                                                      | No<br>gastroenteritis<br><i>n=331</i> | Mild<br>gastroenteritis<br><i>n=414</i> | Severe<br>gastroenteritis<br><i>n=153</i> | <i>p value</i> |
|------------------------------------------------------|---------------------------------------|-----------------------------------------|-------------------------------------------|----------------|
| Smoker                                               | 116 (35.0%)                           | 171 (41.3%)                             | 67 (43.8%)                                | 0.1            |
| Hypertension                                         | 71 (21.5%)                            | 76 (18.4%)                              | 23 (15.0%)                                | 0.2            |
| Cardiovascular/ hypertension medication use          | 58 (17.5%)                            | 58 (14.0%)                              | 21 (13.7%)                                | 0.6            |
| Aspirin use at least once a week                     | 27 (8.2%)                             | 29 (7.0%)                               | 7 (4.6%)                                  | 0.6            |
| Low sodium diet                                      | 96 (29.0%)                            | 131 (31.6%)                             | 48 (31.4%)                                | 0.7            |
| Hypercholesterolemia                                 | 51 (15.4%)                            | 73 (17.6%)                              | 22 (14.4%)                                | 0.6            |
| Obesity (BMI $\geq$ 30 kg/m <sup>2</sup> )           | 116 (35.0%)                           | 164 (39.6%)                             | 53 (34.6%)                                | 0.5            |
| Median serum creatinine, $\mu$ mol/L (IQR)           | 80 (71-90)                            | 79 (69-88)                              | 79 (70-90)                                | 0.5            |
| Median urine protein, g/d (IQR)                      | 0.17 (0.13-0.25)                      | 0.17 (0.12-0.24)                        | 0.16 (0.11-0.24)                          | 0.5            |
| Median urine albumin creatinine ratio, mg/mmol (IQR) | 0.65 (0.45-1.14)                      | 0.61 (0.45-1.03)                        | 0.60 (0.43-1.10)                          | 0.7            |
| Median systolic blood pressure, mmHg (IQR)           | 129 (115-139)                         | 126 (115-141)                           | 128 (116-142)                             | 0.8            |
| Median diastolic blood pressure, mmHg (IQR)          | 76 (70-83)                            | 76 (70-82)                              | 76 (70-83)                                | 0.8            |

Note: IQR= interquartile range, SD = standard deviation.

All data was complete with the exception of aspirin use at least once a week which was missing in 52% of participants, urine protein which was missing in 58% of participants, and urine albumin creatinine which was missing in 0.7% of participants
