# Supplementary material
Source: PubMed Central journal article supplement (PMC3537814)
Supplement: supp_112161_cardio-garg-6-at.pdf [file supp_112161_cardio-garg-6-at.pdf]

**Appendix 6A:** Prescriptions for anti-hypertensive medications in the year before the outbreak

|                                                        | General population | Walkerton participants<br>(no, mild or severe gastroenteritis) |
|--------------------------------------------------------|--------------------|----------------------------------------------------------------|
| Number of individuals age 66-76 years on May 17, 1999: | N=1179             | N=71                                                           |
| Any anti-hypertensive                                  | 326 (27.7%)        | 21 (29.6%)                                                     |
| ACE                                                    | 159 (13.5%)        | ≤ 5 (≤ 7.0%) *                                                 |
| ARB                                                    | 11 (0.9%)          | 0 (0.0%)                                                       |
| ACE or ARB                                             | 167 (14.2%)        | ≤ 5 (≤ 7.0%) *                                                 |
| Beta-blockers                                          | 97 (8.2%)          | 11 (15.5%)                                                     |
| Calcium channel blockers                               | 96 (8.1%)          | 8 (11.3%)                                                      |
| Thiazide diuretics                                     | 109 (9.2%)         | 7 (9.9%)                                                       |

Note:

ACE= angiotensin-converting enzyme inhibitors; ARB= angiotensin receptor blockers

\*Cell sizes less than 5 not reported for reasons of privacy.

**Appendix 6B:** Prescriptions for anti-hypertensive medications between nine and ten years after the outbreak

|                                                          | General population | Walkerton participants (no, mild or severe gastroenteritis) |
|----------------------------------------------------------|--------------------|-------------------------------------------------------------|
| Number of individuals 66-76 years of age on Mar 31, 2009 | N=1991             | N=149                                                       |
| Any anti-hypertensive                                    | 1,059 (53.2%)      | 78 (52.3%)                                                  |
| ACE                                                      | 526 (26.4%)        | 39 (26.2%)                                                  |
| ARB                                                      | 310 (15.6%)        | 13 (8.7%)                                                   |
| ACE or ARB                                               | 798 (40.1%)        | 50 (33.6%)                                                  |
| Beta-blockers                                            | 375 (18.8%)        | 25 (16.8%)                                                  |
| Calcium channel blockers                                 | 298 (15.0%)        | 26 (17.4%)                                                  |
| Thiazide diuretics                                       | 351 (17.6%)        | 28 (18.8%)                                                  |

Note:

ACE= angiotensin-converting enzyme inhibitors; ARB= angiotensin receptor blocke
